# Supplementary material for: Impact of a bathing tradition on shared gut microbe among Japanese families
Source: PubMed Central journal article supplement (PMC6416414; doi:10.1038/s41598-019-40938-3), 2019-03-13
Supplement: 41598_2019_40938_MOESM1_ESM.pdf [file 41598_2019_40938_MOESM1_ESM.pdf]

**-Supplementary Information-**

**Impact of a bathing tradition on shared gut microbe among Japanese families**

**Toshitaka Odamaki<sup>1,2\*</sup>, Francesca Bottacini<sup>2</sup>, Eri Mitsuyama<sup>1</sup>, Keisuke Yoshida<sup>1</sup>, Kumiko Kato<sup>1</sup>, Jin-zhong Xiao<sup>1</sup> and Douwe van Sinderen<sup>2</sup>**

<sup>1</sup>Next Generation Science Institute, Morinaga Milk Industry Co., Ltd., Zama, Kanagawa, Japan

<sup>2</sup>APC Microbiome Ireland and School of Microbiology, National University of Ireland, Western Road, Cork, Ireland

Inventory of Supplementary Information

1. Supplementary Figures and Legends  
Supplementary Figure S1-S2
2. Supplementary Tables  
Supplementary Table S1-S13

Tree scale: 100

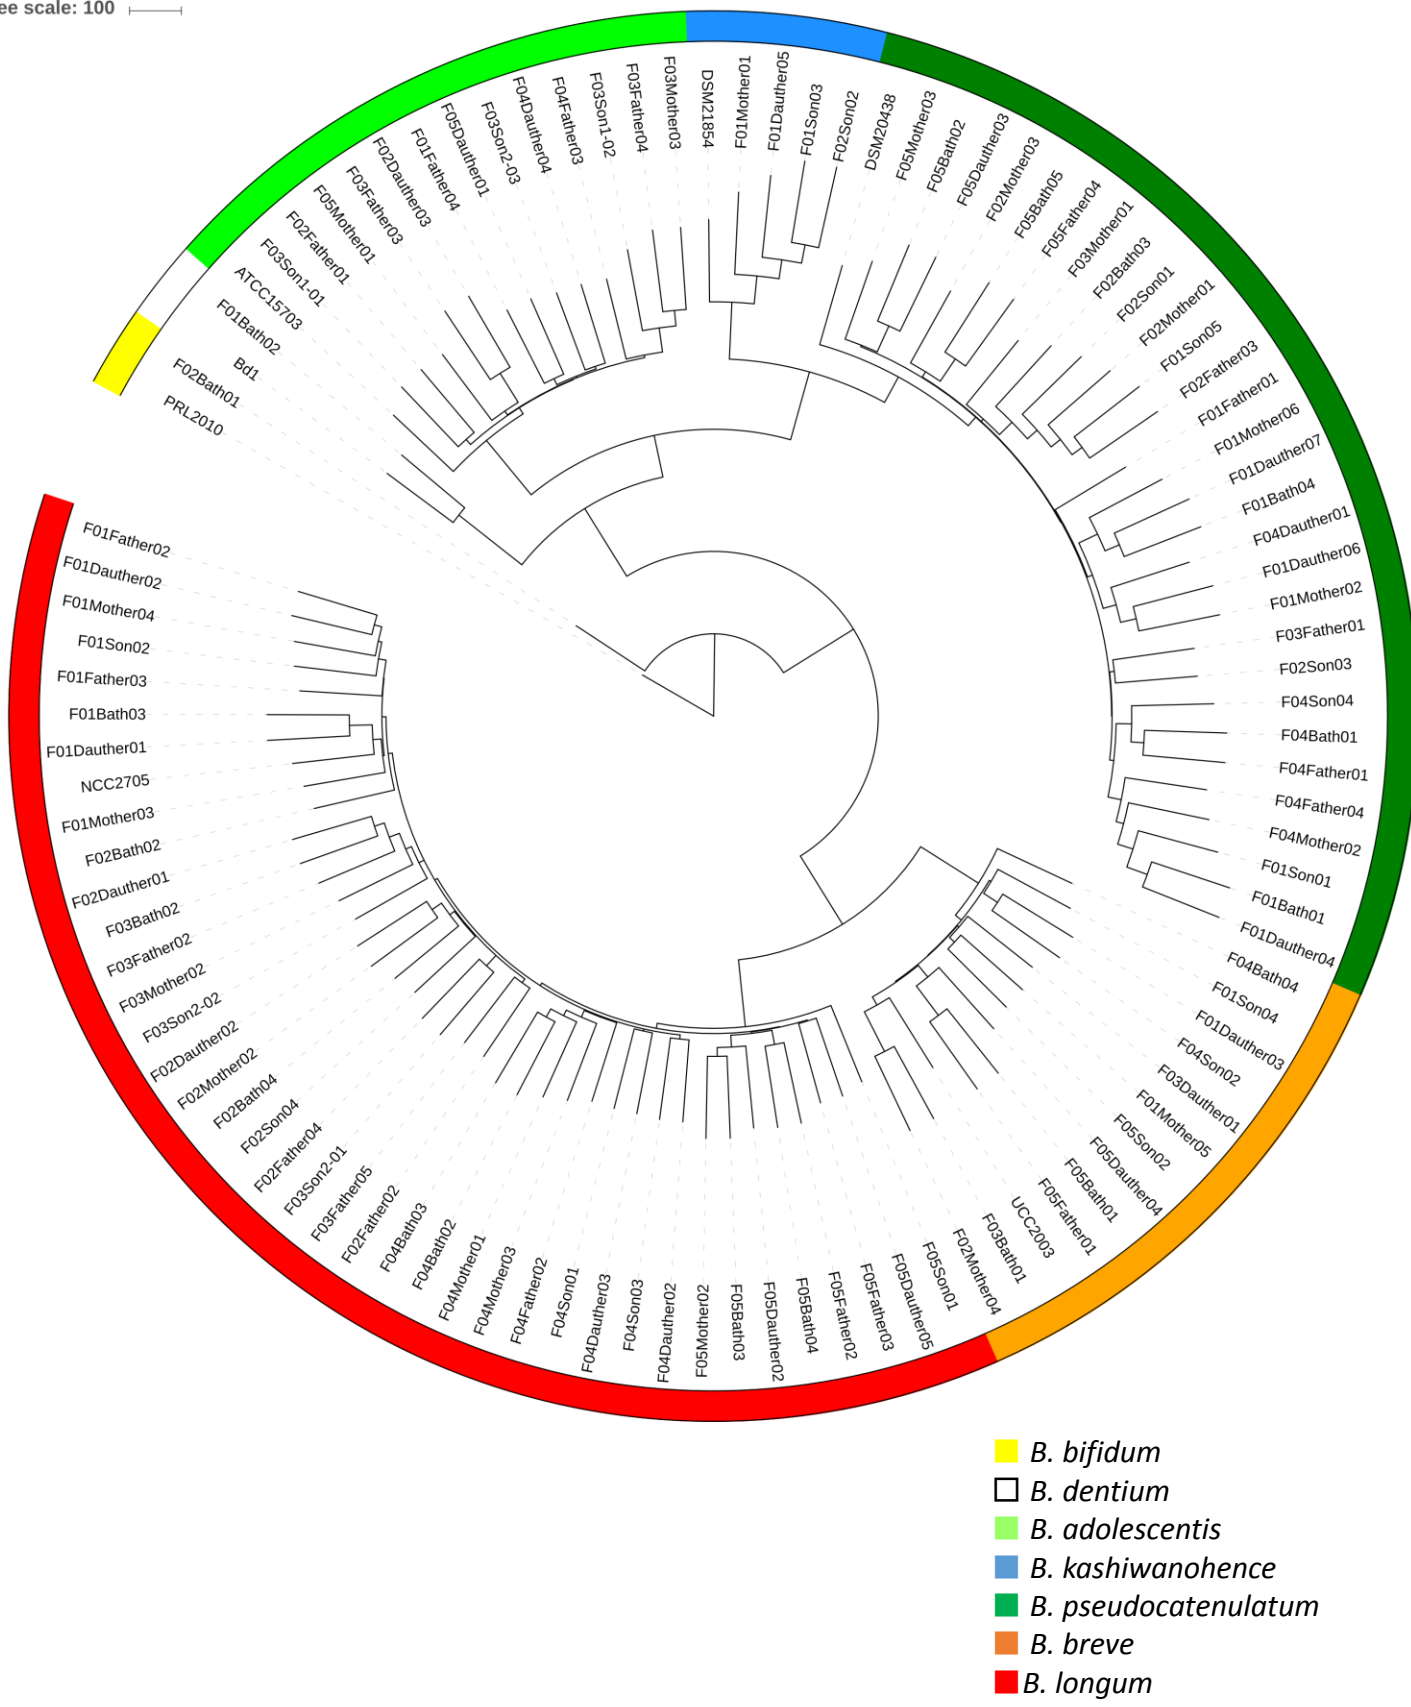

**Supplementary Fig. 1**  
**Cladogram of Bifidobacterial strains**

We identified taxonomical classification of all isolates by the phylogenetic analysis performed on the *Bifidobacterium* core genome.

ANI value

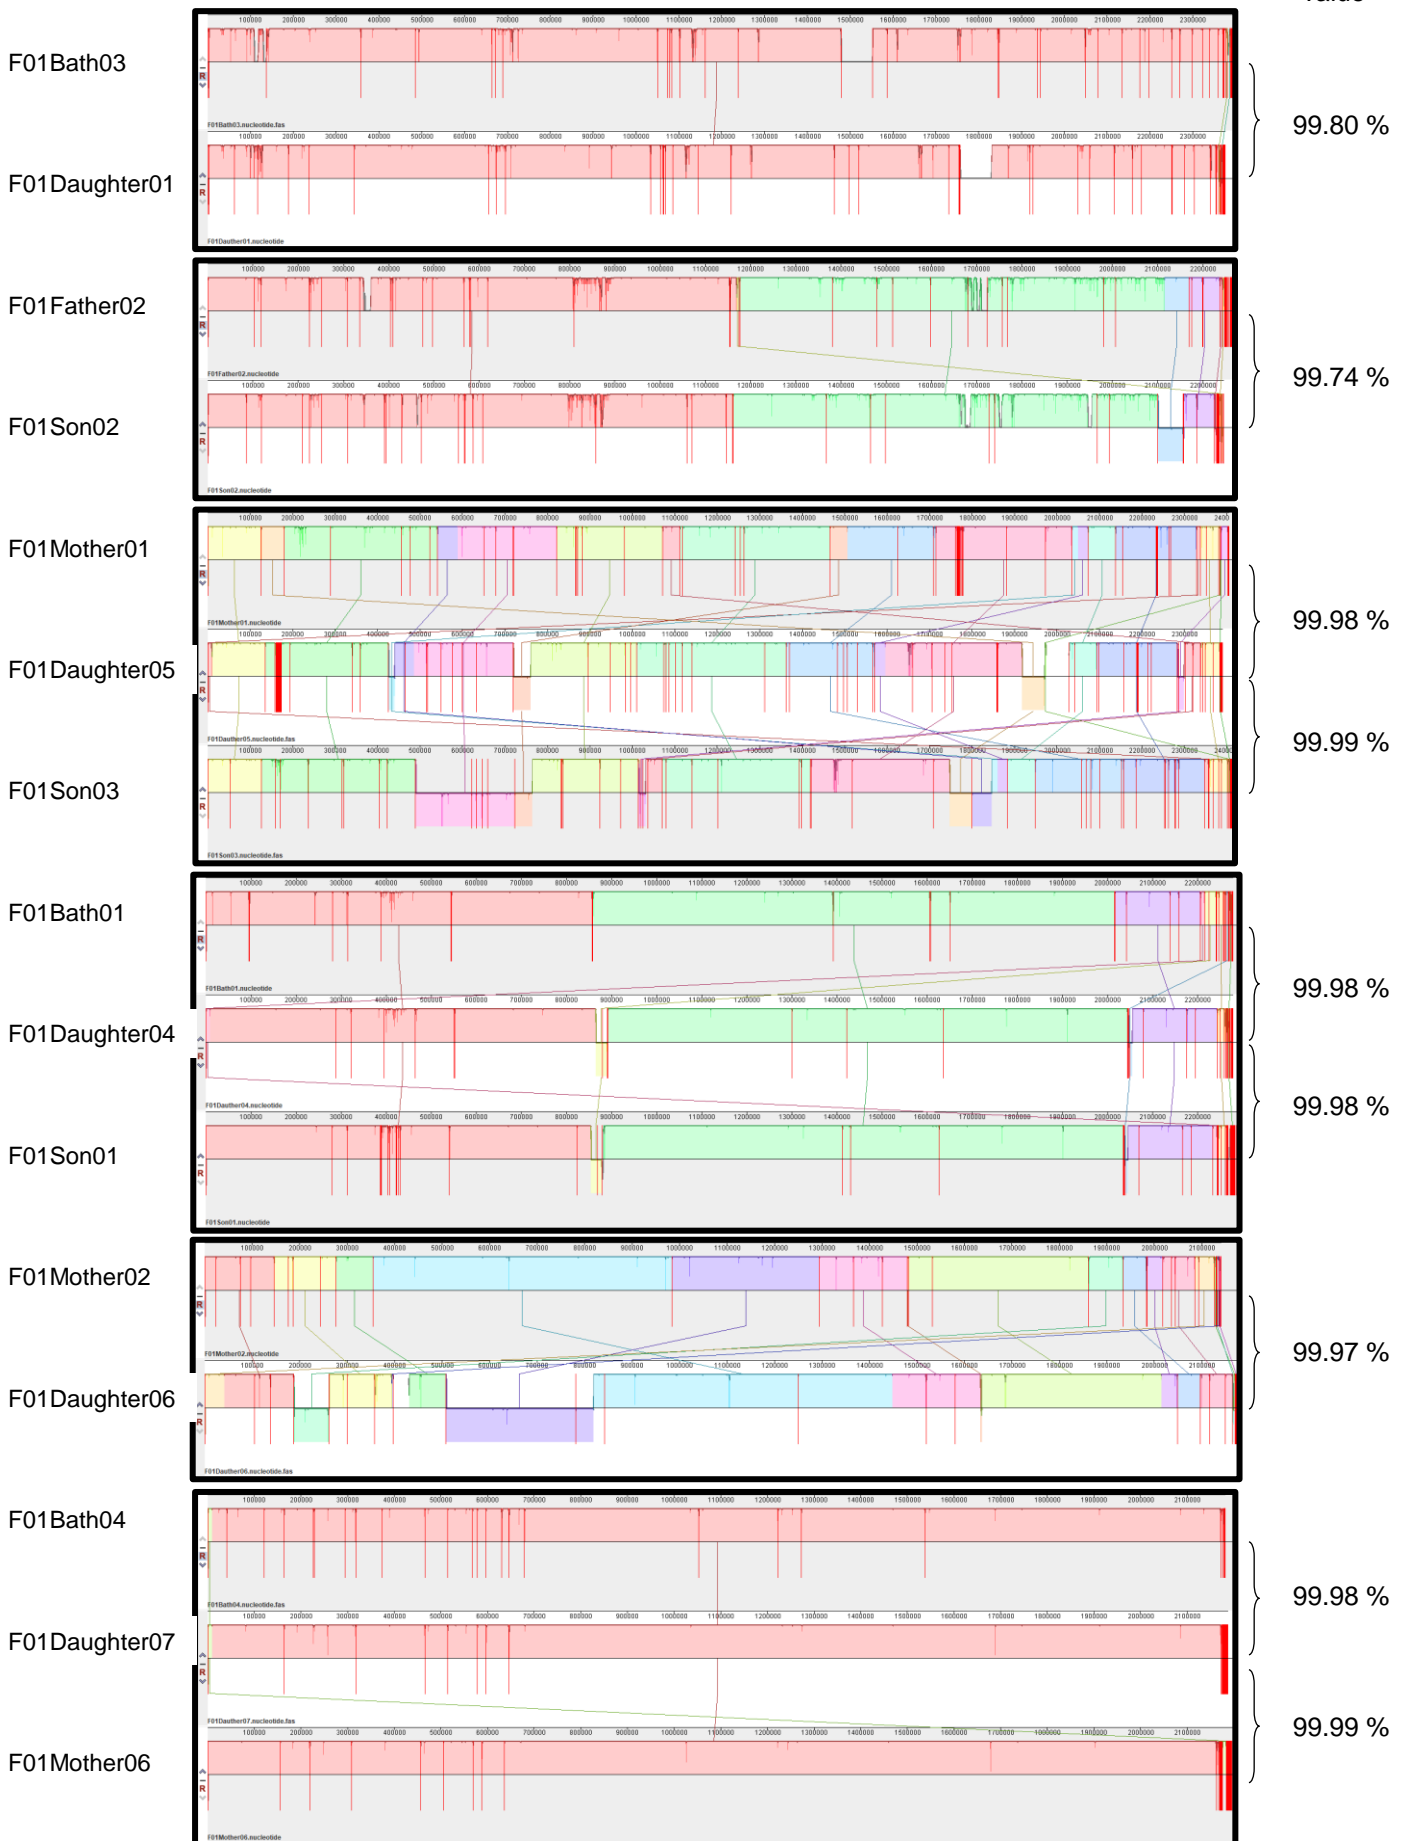

### Supplementary Fig. 2a

#### Sequence similarity between strains putatively transmitted among family1 members and bathtub water

Related to Figure2. As shown in Mauve whole nucleotide alignment, certain strain-sets which were isolated from feces and bathtub water share near identical genome sequences, suggesting that bifidobacterial strains isolated from bathtub water were from family member. General features of each of the newly determined *Bifidobacterium* genomes

ANI value

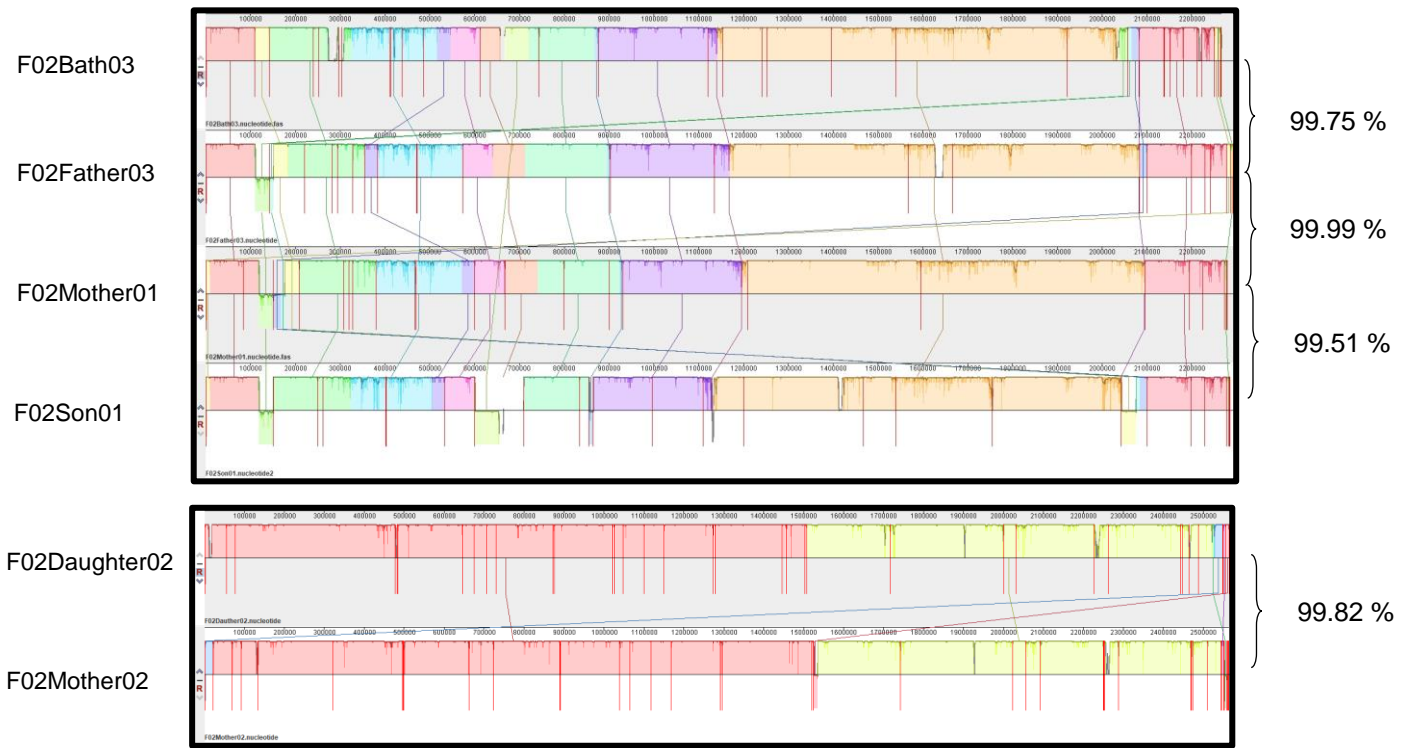

### Supplementary Fig. 2b

#### Sequence similarity between strains putatively transmitted among family2 members and bathtub water

Related to Figure2. As shown in Mauve whole nucleotide alignment, certain strain-sets which were isolated from feces and bathtub water share near identical genome sequences, suggesting that bifidobacterial strains isolated from bathtub water were from family member. General features of each of the newly determined Bifidobacterium genomes

ANI value

F03Bath02  
F03Father02  
F03Mother02  
F03Son2-02

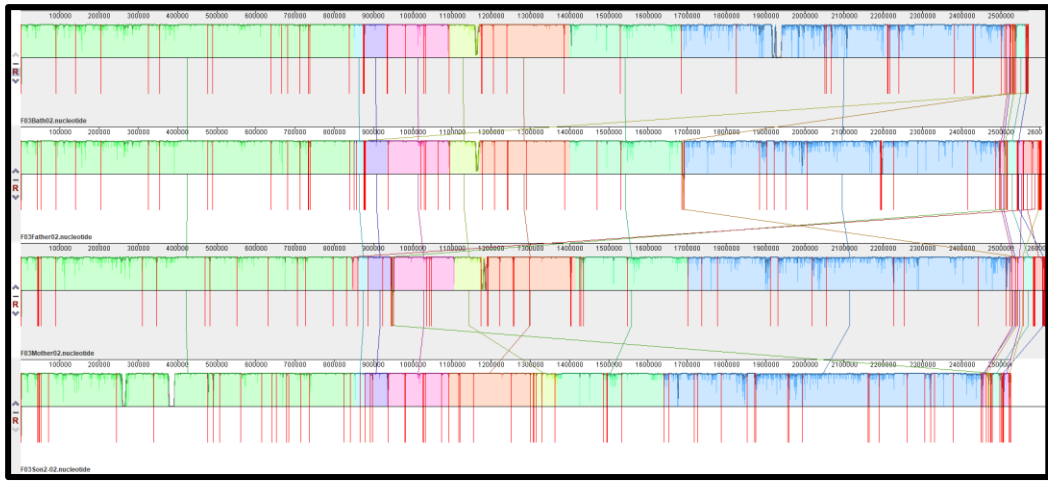

99.82 %  
99.80 %  
99.78 %

F03Mother03  
F03Son1-02

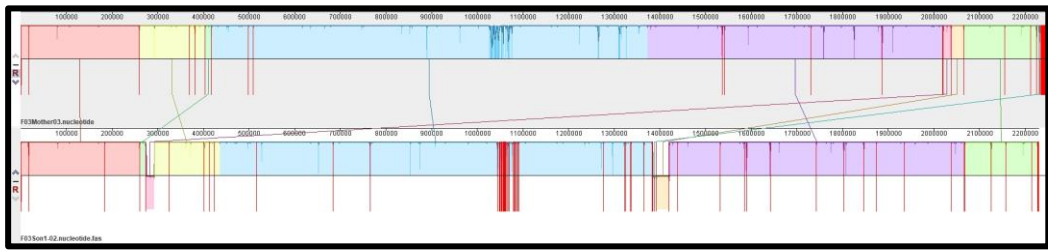

99.97 %

**Supplementary Fig. 2c**

**Sequence similarity between strains putatively transmitted among family3 members and bathtub water**

Related to Figure2. As shown in Mauve whole nucleotide alignment, certain strain-sets which were isolated from feces and bathtub water share near identical genome sequences, suggesting that bifidobacterial strains isolated from bathtub water were from family member. General features of each of the newly determined Bifidobacterium genomes

F04Father04

F04Mother02

F04Son4

F04Father01

F04Bath02

F04Mother03

F04Bath03

F04Mother01

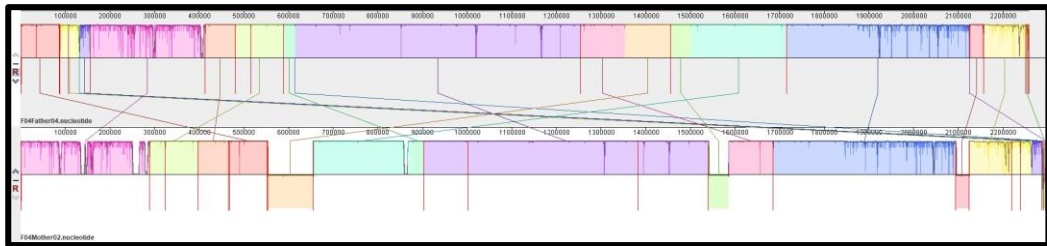

99.61 %

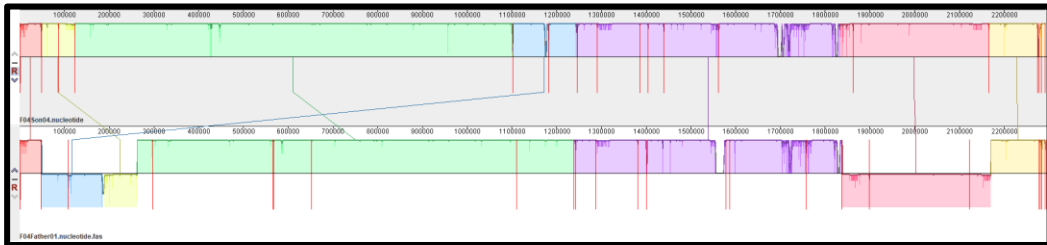

99.82 %

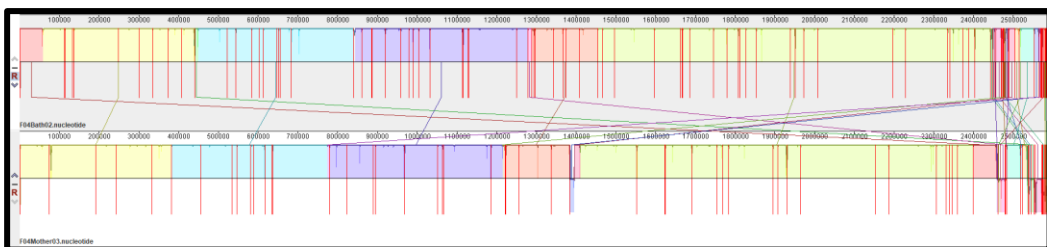

99.99 %

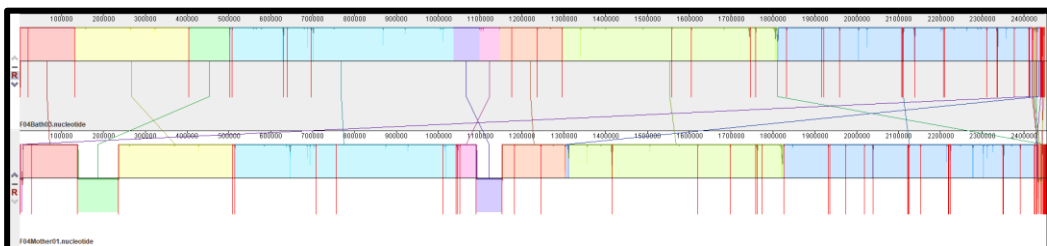

99.99 %

### Supplementary Fig. 2d

#### Sequence similarity between strains putatively transmitted among family4 members and bathtub water

Related to Figure2. As shown in Mauve whole nucleotide alignment, certain strain-sets which were isolated from feces and bathtub water share near identical genome sequences, suggesting that bifidobacterial strains isolated from bathtub water were from family member. General features of each of the newly determined Bifidobacterium genomes

ANI value

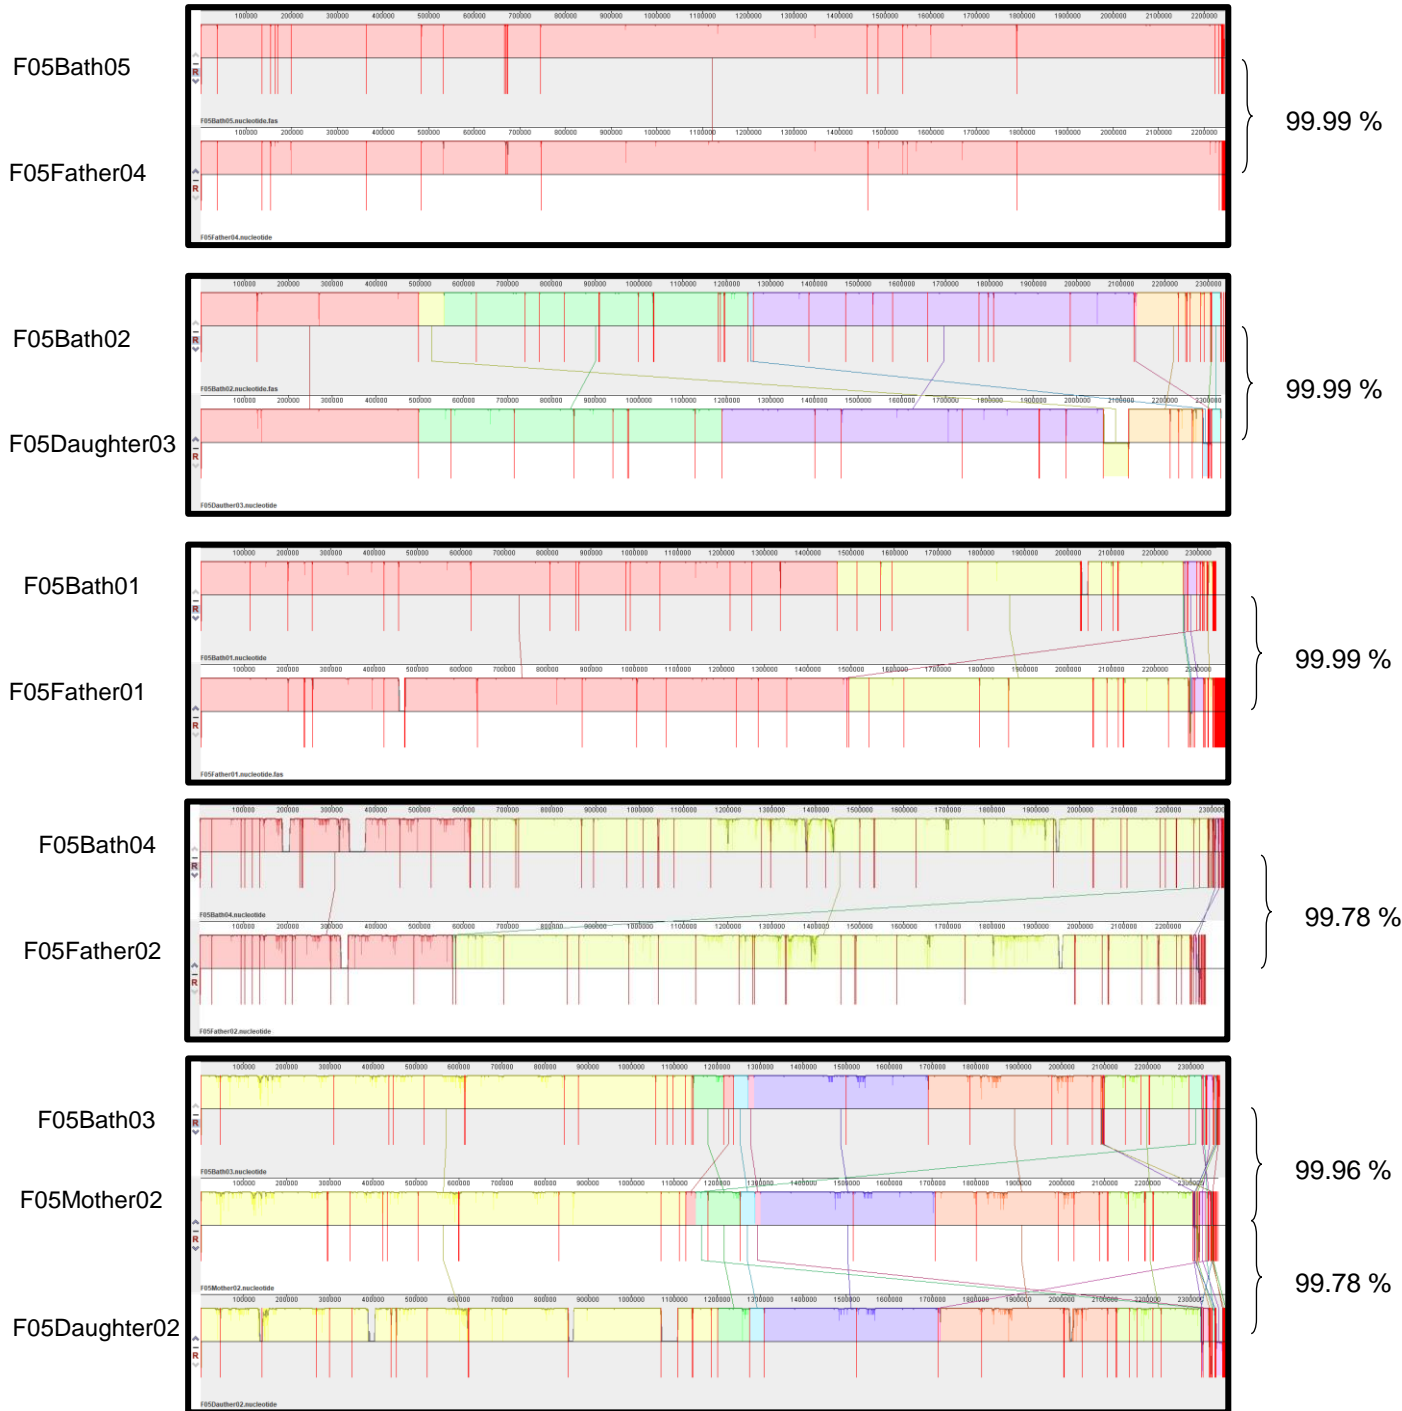

### Supplementary Fig. 2e

#### Sequence similarity between strains putatively transmitted among family5 members and bathtub water

Related to Figure2. As shown in Mauve whole nucleotide alignment, certain strain-sets which were isolated from feces and bathtub water share near identical genome sequences, suggesting that bifidobacterial strains isolated from bathtub water were from family member. General features of each of the newly determined *Bifidobacterium* genomes
